# Supplementary material
Source: Springer Nature journal article supplement (https://www.springermedizin.de/resource/supplementary/12889_2009_2164_MOESM3_ESM.pdf/9484808)

### Distribution by Region

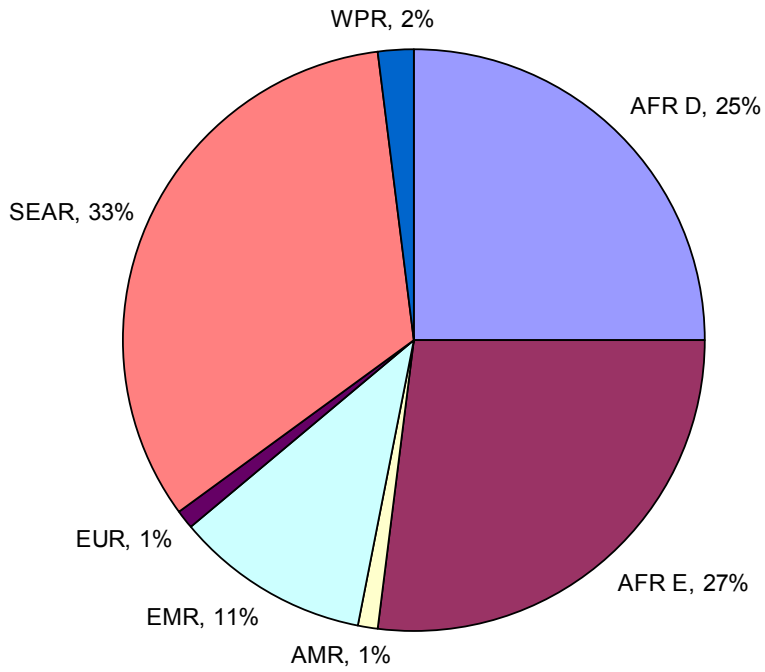

### Distribution by Incidence Level

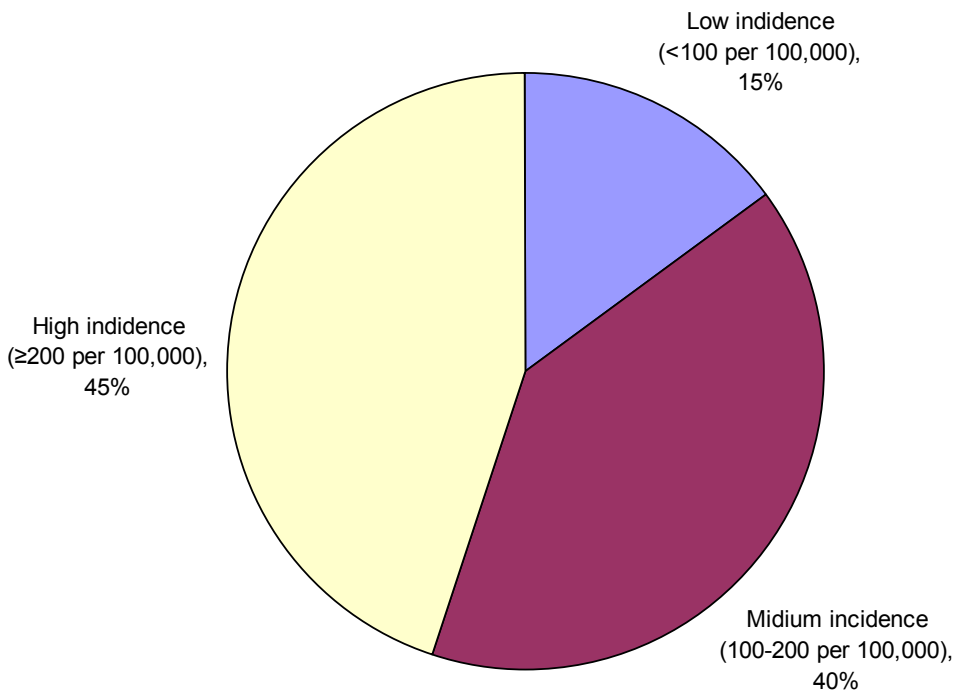

Supplement: MOESM3 [file 9484808]
